# Supplementary material for: Two metal-free perovskite molecules with different 3D frameworks show reversible phase transition, dielectric anomaly and SHG effect
Source: Royal Society of Chemistry journal article supplement (doi:10.1039/d2dt03889g), 2023-01-01
Supplement: d2dt03889g1.pdf [file d2dt03889g1.pdf]

## Two Metal-Free Perovskite Molecules with Different 3D Frameworks Show

### Reversible Phase Transition, Dielectric Anomaly and SHG Effect

Haina Zhang, Xiuli You, Mengxia Zhang, Wenjin Guo, Zhenhong Wei,\* Hu Cai<sup>1,\*</sup>

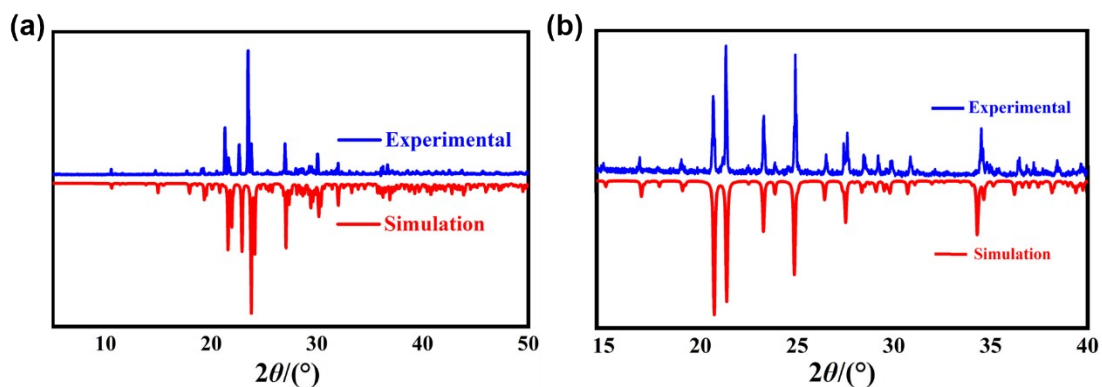

**Fig. S1.** The powder XRD of **1** (a) and **2** (b) with the simulated one in red and the measured one in blue.

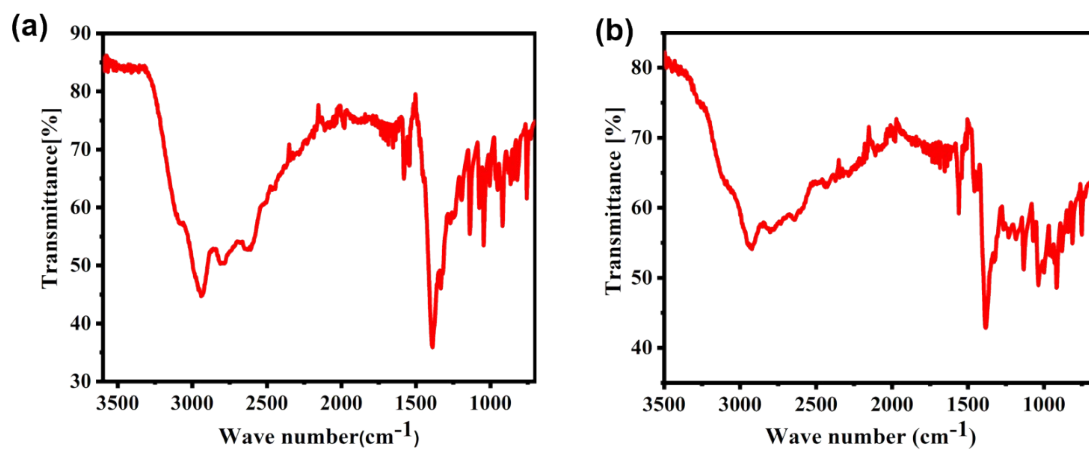

**Fig. S2.** The infrared spectra of **1** (a) and **2** (b).

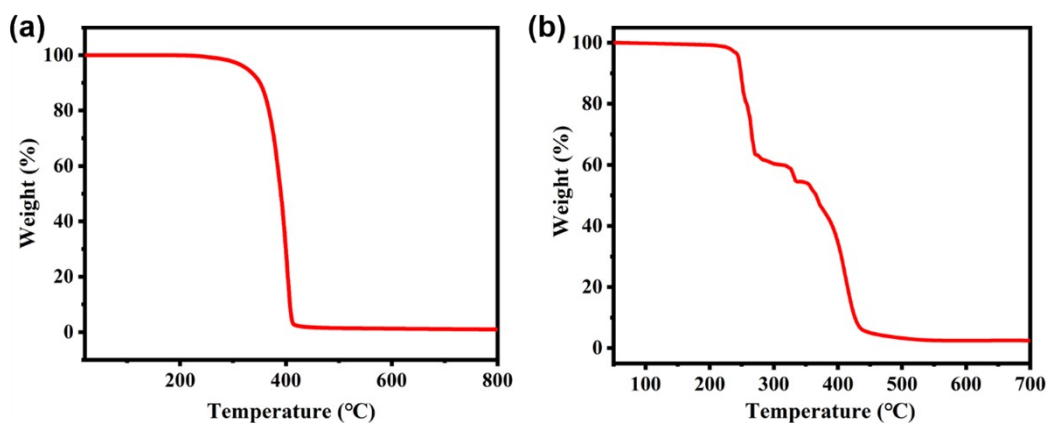

**Fig. S3.** TGA curves of compounds 1(a) and 2 (b).

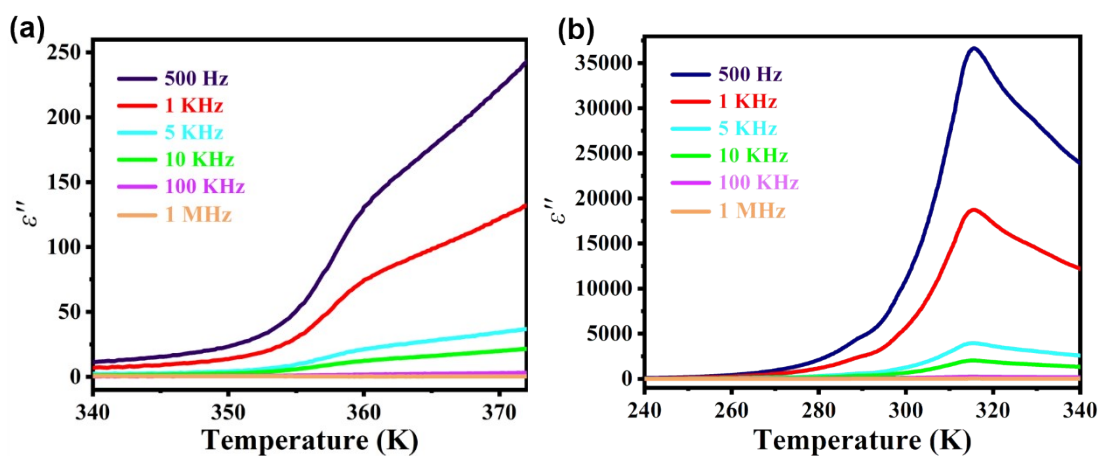

**Fig. S4.** The  $\epsilon''$  of compound 1 (a) and 2 (b) varies with temperature at the different frequencies.

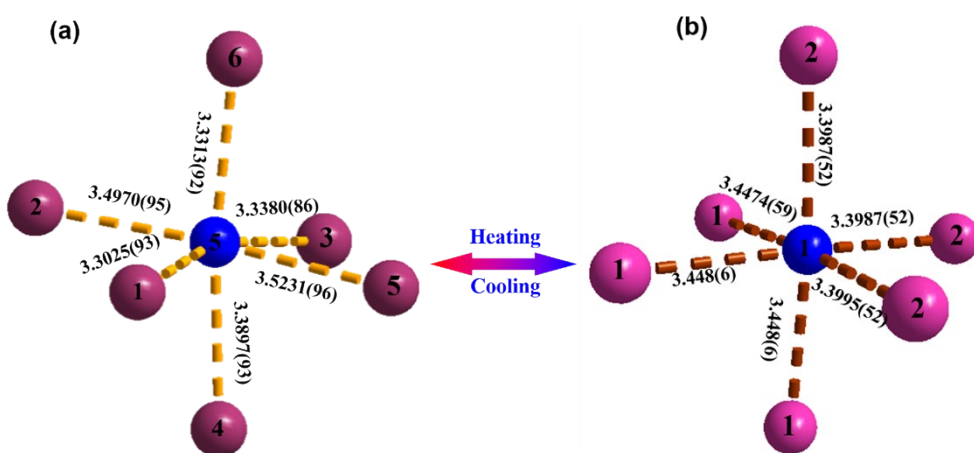

**Fig. S5.** The N...Br distances in 1 at LTP (a) and at HTP (b)

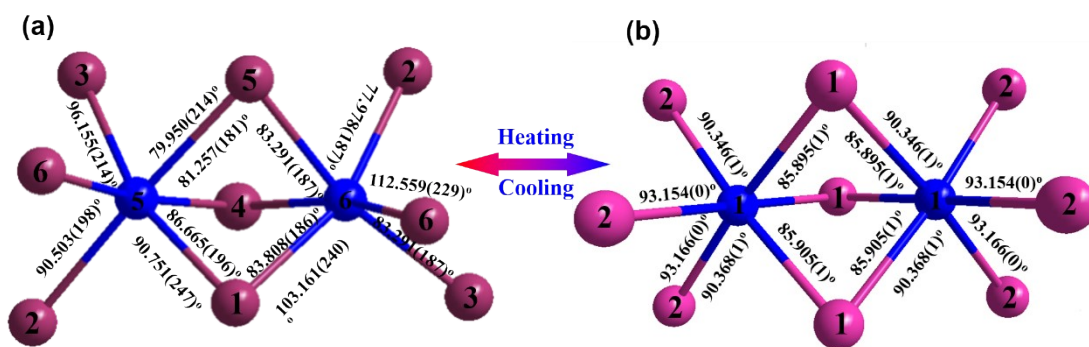

**Fig. S6.** The Br...N...Br bond angles (°) of **1** at LTP (a) and at HTP (b).

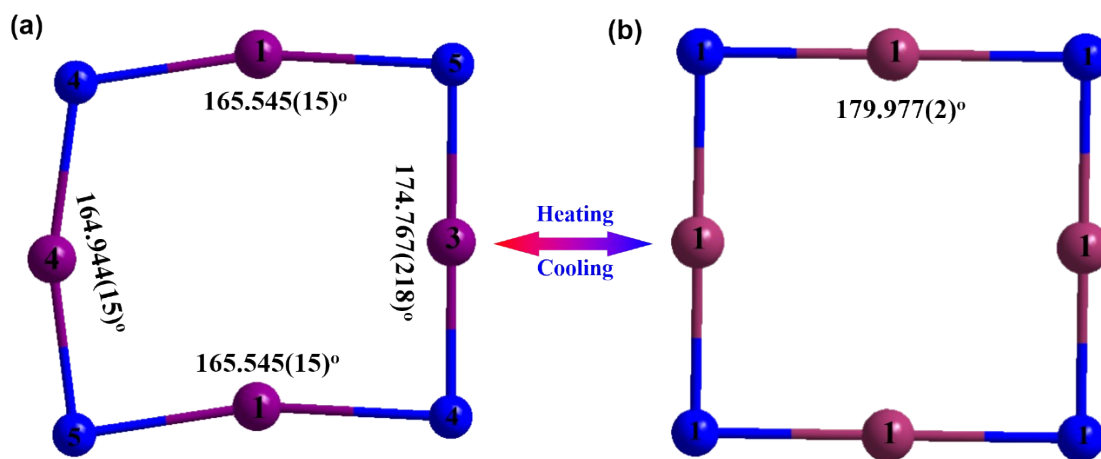

**Fig. S7.** The I...N...I bond angles (°) of **2** at LTP (a) and HTP (b).

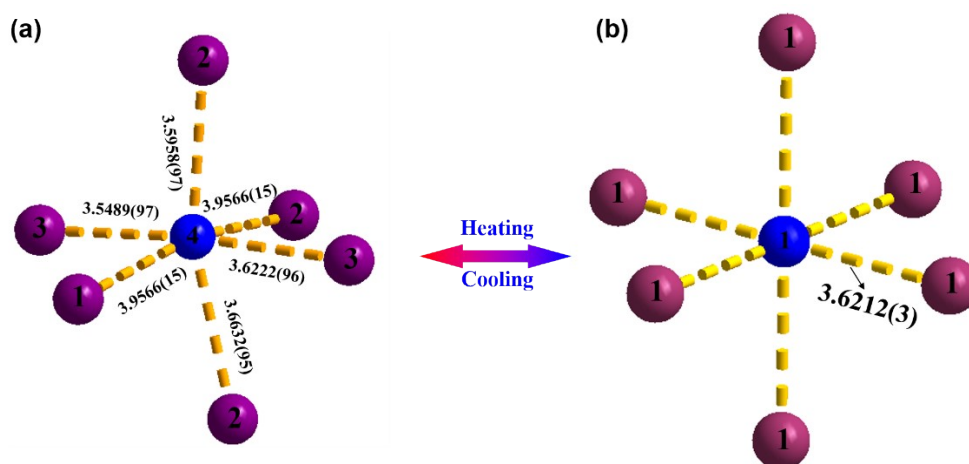

**Fig. S8.** The N...I bond lengths (Å) of **2** at LTP (a) and HTP (b).

**Tab. S1** Crystal data and structure refinements for **1** at LTP and HTP.

Formula

**1**

|                                                            |                                  |                                 |
|------------------------------------------------------------|----------------------------------|---------------------------------|
| Temperature                                                | 296 K                            | 373 K                           |
| Formula Mass                                               | 381.93                           | 381.93                          |
| Crystal system                                             | orthorhombic                     | hexagonal                       |
| Space group                                                | <i>Pna2<sub>1</sub></i>          | <i>P63/mmc</i>                  |
| <i>a</i> (Å)                                               | 16.767(8)                        | 9.8750(2)                       |
| <i>b</i> (Å)                                               | 9.909(4)                         | 9.8750(2)                       |
| <i>c</i> (Å)                                               | 15.520(7)                        | 15.9170(6)                      |
| <i>V</i> (Å) <sup>3</sup>                                  | 2579(2)                          | 1344.21(6)                      |
| <i>Z</i>                                                   | 8                                | 1                               |
| <i>D</i> <sub>calc</sub> (g·cm <sup>-3</sup> )             | 1.967                            | 1.699                           |
| <i>F</i> (000)                                             | 1472.0                           | 628.0                           |
| $\theta_{\max}$                                            | 24.990                           | 75.610                          |
| $\mu$ (Mo Ka, mm <sup>-1</sup> )                           | 9.352                            | 10.786                          |
| Total no. of reflns.                                       | 12617                            | 4469                            |
| No. of unique reflns.                                      | 4529 [R <sub>int</sub> = 0.0625] | 573 [R <sub>int</sub> = 0.0159] |
| No. of variables                                           | 236                              | 44                              |
| <i>R</i> <sub>1</sub> , <i>wR</i> <sub>2</sub> (obsd data) | 0.0461, 0.1006                   | 0.1283, 0.4144                  |
| <i>R</i> <sub>1</sub> , <i>wR</i> <sub>2</sub> (all data)  | 0.0638, 0.1080                   | 0.1327, 0.4233                  |
| GOF, <i>S</i>                                              | 1.052                            | 3.772                           |
| Max./min. peak (e. Å <sup>-3</sup> )                       | 0.77, -0.79                      | 1.20, -1.15                     |

**Tab. S2** Crystal data and structure refinements for **2** at LTP and HTP.

| Formula        | <b>2</b>     |             |
|----------------|--------------|-------------|
| Temperature    | 293 K        | 330 K       |
| Formula Mass   | 1063.87      | 502.8       |
| Crystal system | orthorhombic | trigonal    |
| Space group    | <i>Ama2</i>  | <i>Rm</i>   |
| <i>a</i> (Å)   | 30.562(6)    | 10.2423(12) |
| <i>b</i> (Å)   | 10.349(2)    | 10.2423(12) |

|                                          |                                |                               |
|------------------------------------------|--------------------------------|-------------------------------|
| $c$ (Å)                                  | 9.908(2)                       | 12.5442(14)                   |
| $V$ (Å) <sup>3</sup>                     | 3133.9(11)                     | 1139.6(2)                     |
| $Z$                                      | 4                              | 3                             |
| $D_{\text{calc}}$ (g·cm <sup>-3</sup> )  | 2.255                          | 2.799                         |
| $F$ (000)                                | 1944.0                         | 866.0                         |
| $\theta_{\text{max}}$                    | 27.600                         | 75.870                        |
| $\mu$ (Mo K $\alpha$ ,mm <sup>-1</sup> ) | 5.962                          | 48.482                        |
| Total no. of reflns.                     | 9204                           | 1532                          |
| No. of unique reflns.                    | 3709[R <sub>int</sub> =0.0453] | 295[R <sub>int</sub> =0.1551] |
| No. of variables                         | 132                            | 16                            |
| $R_1, wR_2$ (obsd data)                  | 0.0293, 0.0613                 | 0.1211, 0.2973                |
| $R_1, wR_2$ (all data)                   | 0.0323, 0.0629                 | 0.1414, 0.3265                |
| GOF, $S$                                 | 0.967                          | 1.006                         |
| Max./min.peak(e.Å <sup>-3</sup> )        | 0.65, -0.82                    | 0.81, -2.27                   |

**Tab. S3** Hydrogen bond lengths [Å] and angles [°] of **1** at 293 K.

| D-H...A      | D-H [Å] | H...A[Å] | D...A[Å]  | D-H...A[°] |
|--------------|---------|----------|-----------|------------|
| N1-H1C...Br1 | 0.91    | 2.41     | 3.246(7)  | 153        |
| N2-H2A...Br6 | 0.90    | 2.70     | 3.550(11) | 157        |
| N2-H2B...Br4 | 0.90    | 2.64     | 3.427(11) | 147        |
| N3-H3...Br6  | 0.91    | 2.27     | 3.187(12) | 175        |
| N4-H4C...Br2 | 0.90    | 2.62     | 3.453(12) | 154        |
| N4-H4D...Br5 | 0.90    | 2.46     | 3.318(12) | 159        |

**Tab. S4** Hydrogen bond lengths [Å] and angles [°] of **2** at 293 K.

| D-H...A     | D-H [Å] | H...A[Å] | D...A[Å] | D-H...A[°] |
|-------------|---------|----------|----------|------------|
| N1-H1...I2  | 0.98    | 2.61     | 3.527(6) | 156        |
| O1-H1C...I4 | 0.85    | 2.64     | 3.475(5) | 167        |
| O1-H1D...I4 | 0.85    | 2.90     | 3.475(5) | 127        |

|             |      |      |          |     |
|-------------|------|------|----------|-----|
| N2-H2A...O1 | 0.89 | 2.00 | 2.829(7) | 155 |
| N2-H2B...I1 | 0.89 | 2.81 | 3.647(6) | 158 |

---
